# Supplementary material for: Salvage-Laryngektomie nach primärer Radio- und Radiochemotherapie
Source: Springer Nature journal article supplement (doi:10.1007/s00106-021-01029-w), 2021-04-09
Supplement: MOESM1 [file 19050426]

## Übersicht über die Patientenkohorte

| Nr. | G | A<br>(ED) | TR | cT   | cN   | UICC<br>(ED) | PT  | TG<br>(Gy) | ycrT | ycrN | OP  | A<br>(OP) | ND | Reko  | rpT  | rpN  | UICC<br>(OP) | R  | Rez   | tR<br>(W) | Status | ÜZ<br>(M) | KFÜ<br>(M) |
|-----|---|-----------|----|------|------|--------------|-----|------------|------|------|-----|-----------|----|-------|------|------|--------------|----|-------|-----------|--------|-----------|------------|
| 1   | m | 42        | La | cT2  | cN1  | III          | RCT | 65,0       | T2   | NO   | kLE | 70        | -  | -     | pT1  |      | I            | RO | -     |           | L      |           | 2,0        |
| 2   | w | 67        | HP | cT4a | cN2b | IV           | RCT | 72,0       | T4a  | N1   | kLE | 70        | b  | Ra    | pT3  | pN0  | III          | RO | -     |           | L      |           | 3,0        |
| 3   | m | 59        | La | cT3  | cN2c | IV           | RCT | 66,0       | T4a  | N2b  | kLE | 59        | b  | ALT   | pT3  | pN3b | IV           | RO | -     |           | L      |           | 13,0       |
| 4   | m | 72        | La | cT3  | cN0  | III          | RCT | 66,0       | T3   | NO   | kLE | 75        | b  | -     | pT3  | pN0  | III          | RO | -     |           | T      | 4,0       | 4,0        |
| 5   | w | 51        | La | cT4a | cN2b | IV           | RT  | 68,0       | T4a  | NO   | kLE | 54        | b  | Ra    | pT4a | pN0  | IV           | RO | l     | 82        | L      |           | 18,0       |
| 6   | m | 55        | La | cT3  | cN0  | III          | RCT | 72,0       | T3   | NO   | kLE | 56        | -  | -     | pT4a |      | IV           | RO | -     |           | L      |           | 31,0       |
| 7   | m | 72        | La | cT3  | cN2b | IV           | RCT | 70,0       | T3   | N1   | kLE | 74        | b  | -     | pT4b | pN0  | IV           | RO | f     | 12        | T      | 4,0       | 2,0        |
| 8   | m | 55        | La | cT2  | cN2b | IV           | RCT | 72,0       | T3   | NO   | kLE | 56        | b  | -     | pT3  | pN3b | IV           | RO | f     | 125       | L      |           | 28,0       |
| 9   | m | 53        | La | cT4a | cN0  | IV           | RCT | 68,0       | T4a  | NO   | kLE | 55        | -  | -     | pT3  |      | III          | RO | f     | 46        | L      |           | 10,0       |
| 10  | m | 52        | La | cT2  | cN0  | II           | RCT | 66,0       | T3   | NO   | kLE | 55        | -  | ALT   | pT3  |      | III          | RO | l/r/f | 62        | L      |           | 14,0       |
| 11  | m | 62        | HP | cT4a | cN2c | IV           | RCT | 70,0       | T4a  | NO   | kLE | 67        | -  | Ra    | pT1  |      | I            | RO | f     | 88        | T      | 28,0      | 20,0       |
| 12  | m | 49        | La | cT2  | cN2b | IV           | RCT | 72,0       | T2   | NO   | kLE | 49        | b  | -     | pT2  | pN0  | II           | RO | -     |           | L      |           | 51,0       |
| 13  | w | 60        | La | cT2  | cN2b | IV           | RCT | 66,0       | T2   | NO   | kLE | 62        | u  | Ra    | pT2  | pN0  | II           | RO | f     | 33        | T      | 42,0      | 7,0        |
| 14  | m | 82        | La | cT4a | cN1  | IV           | RCT | 72,0       | T4a  | NO   | kLE | 83        | b  | -     | pT3  | pN0  | III          | RO | f     | 11        | T      | 2,0       | 2,0        |
| 15  | m | 69        | HP | cT3  | cN0  | III          | RCT | 70,6       | T4a  | NO   | kLE | 69        | b  | Ra/DP | pT3  | pN0  | III          | RO | -     |           | T      | 1,0       | 1,0        |
| 16  | m | 60        | HP | cT4a | cN2b | IV           | RCT | 70,0       | T4a  | N1   | kLE | 61        | b  | Ra    | pT3  | pN0  | III          | RO | r/f   | 61        | T      | 14,0      | 14,0       |
| 17  | w | 65        | HP | cT4a | cN0  | IV           | RCT | 71,2       | T3   | NO   | kLE | 67        | -  | -     | pT4a |      | IV           | R1 | -     |           | T      | 1,0       | 0,0        |
| 18  | m | 58        | HP | cT3  | cN0  | III          | RCT | 73,6       | T3   | NO   | kLE | 62        | u  | PM    | pT4b | pN0  | IV           | RO | -     |           | T      | 0,0       | 0,0        |
| 19  | m | 68        | HP | cT2  | cN0  | II           | RCT | 72,0       | T4a  | NO   | kLE | 72        | -  | ALT   | pT4a |      | IV           | RO | -     |           | T      | 1,0       | 1,0        |
| 20  | w | 54        | HP | cT3  | cN1  | III          | RCT | 70,0       | T4a  | NO   | kLE | 55        | u  | ALT   | pT4b | pN0  | IV           | RO | l     | 12        | L      |           | 2,0        |
| 21  | m | 69        | HP | cT2  | cN2c | IV           | RCT | 71,8       | T3   | NO   | kLE | 71        | -  | PM    | pT1  |      | I            | RO | -     |           | T      | 27,0      | 27,0       |
| 22  | m | 49        | HP | cT3  | cN0  | III          | RCT | 72,4       | T3   | NO   | kLE | 50        | -  | -     | pT4a |      | IV           | RO | l     | 85        | T      | 24,0      | 19,0       |
| 23  | m | 62        | La | cT4a | cN2c | IV           | RCT | 72,0       | T4a  | N1   | kLE | 63        | b  | -     | pT4a | pN0  | IV           | R1 | l     | 72        | T      | 30,0      | 0,0        |
| 24  | m | 80        | La | cT2  | cN0  | II           | RT  | 70,2       | T4a  | NO   | kLE | 81        | -  | -     | pT4a |      | IV           | RO | l     | 49        | T      | 11,0      | 11,0       |
| 25  | m | 86        | La | cT1  | cN0  | I            | RT  | 66,6       | T2   | NO   | kLE | 91        | -  | -     | pT2  |      | II           | RO | -     |           | T      | 11,0      | 11,0       |
| 26  | m | 78        | La | cT3  | cN0  | III          | RT  | 70,0       | T4a  | NO   | kLE | 81        | -  | DP    | pT4a |      | IV           | R1 | -     |           | T      | 5,0       | 0,0        |
| 27  | m | 68        | La | cT3  | cN1  | III          | RT  | 70,6       | T4a  | NO   | kLE | 68        | -  | DP    | pT4a |      | IV           | RO | l/f   | 22        | T      | 9,0       | 5,0        |
| 28  | m | 51        | HP | cT4a | cN0  | IV           | RCT | 63,0       | T4a  | NO   | kLE | 54        | b  | -     | pT4a | pN0  | IV           | RO | -     |           | T      | 1,0       | 1,0        |
| 29  | m | 72        | La | cT3  | cN0  | III          | RT  | 70,2       | T3   | NO   | kLE | 72        | -  | -     | pT4a |      | IV           | RO | -     |           | T      | 17,0      | 17,0       |
| 30  | m | 65        | La | cT3  | cN0  | III          | RT  | 64,0       | T3   | NO   | kLE | 70        | -  | -     | pT4a |      | IV           | RO | l/r/f | 295       | T      | 70,0      | 67,0       |
| 31  | m | 67        | La | cT2  | cN0  | II           | RT  | 59,4       | T3   | NO   | kLE | 69        | b  | -     | pT2  | pN0  | II           | RO | -     |           | L      |           | 206,0      |
| 32  | m | 46        | La | cT4a | cN2c | IV           | RCT | 60,0       | T4a  | N2b  | KT  | 47        | b  | -     | pT1  | pN0  | I            | RO | -     |           | T      | 197,0     | 197,0      |
| 33  | w | 63        | La | cT4a | cN2c | IV           | RCT | 72,0       | T4a  | NO   | KT  | 64        | -  | -     | pT1  |      | I            | RO | l/f   | 11        | T      | 21,0      | 2,0        |

## Abkürzungen:

**G:** Geschlecht

**A:** Alter

**ED:** Erstdiagnose

**TR:** Tumorregion

**La:** Larynx

**HP:** Hypopharynx

**cT:** klinische Tumorausdehnung

**cN:** klinischer Befall der Lymphknoten

**PT:** Primärtherapie

**TG:** Tumorgebiet

**RCT:** Radiochemotherapie

**RT:** Radiotherapie

**Gy:** Gray

**yrct:** klinische Tumorausdehnung nach Primärtherapie

**yrCN:** klinischer Befall der Lymphknoten nach Primärtherapie

**kLE:** Komplette Laryngektomie

**KT:** Kehlkopfteilresektion

**ND:** Neck Dissektion

**b:** bilateral (zweiseitig)

**u:** unilateral (einseitig)

**Reko:** Rekonstruktionsparameter

**ALT:** anterolateraler Oberschenkelappen

**DP:** Deltopectoral Lappen

**PM:** Pectoralis major Lappen

**Ra:** Radialis

**rpT:** histopathologische Tumorausdehnung Salvage OP

**rpN:** histopathologischer Lymphknotenbefall in Salvage OP

**R:** Resektionsstatus

**Rez:** Rezidiv

**I:** Lokalrezidiv

**r:** Regionalrezidiv

**f:** Fernmetastasen

**L:** Lebend

**T:** Tot

**ÜZ:** Überlebenszeit in Monaten

**KFÜ:** Krankheitsfreies Überleben in Monaten

## Art der Fernmetastasen:

**Nr. 7:** mediastinaler Lymphknoten/pulmonal

**Nr. 8:** pulmonal

**Nr. 9:** pulmonal/Weichteilgewebe/ossär

**Nr. 10:** pulmonal

**Nr. 11:** pulmonal

**Nr. 13:** pulmonal

**Nr. 14:** pulmonal

**Nr. 16:** pulmonal/hepatisch/ossär

**Nr. 27:** Haut

**Nr. 30:** pulmonal

**Nr. 33:** pulmonal
